# Supplementary material for: A Pre-Training Technique to Localize Medical BERT and to Enhance Biomedical BERT
Source: Research Square preprint supplement (doi:10.21203/rs.3.rs-103477/v1), 2020-11-12
Supplement: Supplementary file 1 [file a04b210820371b8dbe225260.docx]

# Appendix

**Table A1. Selection of target articles using the MeSH tree number for sP and fP.**

| Flag | MeSH Tree Number | small PubMed abstracts (sP) | Focused PubMed abstracts (fP) |
| --- | --- | --- | --- |
| **Included** | [C] Diseases | ✓ | ✓ |
| **Excluded** | [A13] Animal Structures | ✓ |  |
| [A16] Embryonic Structures | ✓ |  |
| [A18] Plant Structures | ✓ | ✓ |
| [A19] Fungal Structures | ✓ | ✓ |
| [A20] Bacterial Structures | ✓ | ✓ |
| [A21] Viral Structures | ✓ | ✓ |
| [B01.650] Plants | ✓ | ✓ |
| [B02] Archaea | ✓ | ✓ |
| [B03] Bacteria | ✓ |  |
| [B04] Viruses | ✓ |  |
| [B05] Organism Forms | ✓ | ✓ |
| [C22] Animal Diseases | ✓ |  |
| [D26] Pharmaceutical Preparations | ✓ |  |
| [E03] Anesthesia and Analgesia | ✓ |  |
| [E05] Investigative Techniques | ✓ | ✓ |
| [E06] Dentistry | ✓ |  |
| [E07] Equipment and Supplies | ✓ | ✓ |
| [F02] Psychological Phenomena | ✓ | ✓ |
| [F04] Behavioral Disciplines and Activities | ✓ | ✓ |
| [G] Phenomena and Processes | ✓ |  |
| [G17] Mathematical Concepts |  | ✓ |
| [H01] Natural Science Disciplines | ✓ | ✓ |
| [I] Anthropology, Education, Sociology, and Social Phenomena | ✓ | ✓ |
| [J] Technology, Industry, and Agriculture | ✓ | ✓ |
| [K] Humanities | ✓ | ✓ |
| [L] Information Science | ✓ | ✓ |
| [N] Named Groups | ✓ | ✓ |
| [Z] Geographicals | ✓ | ✓ |

**If an article has an “Included” tree number and does not have any “Excluded” ones, it is considered a target article. Furthermore, to adjust the corpus size of sP, we sampled articles published after 2010.**

**Table A2.  Performance of ouBioBERT on the BLUE task in detail.**

| Model | | Total | MedSTS | BIOSSES | BC5CDR -disease | BC5CDR -chemical | ShARe/ CLEFE | DDI | ChemProt | i2b2 2010 | HoC | MedNLI |
| --- | --- | --- | --- | --- | --- | --- | --- | --- | --- | --- | --- | --- |
| BioBERT  (W + BC/ P:  BaseVocab) | | 82.8 (0.1) | 84.9 (0.5) | 89.3 (1.7) | 85.7 (0.4) | 93.3 (0.1) | 78.0 (0.8) | 80.4 (0.4) | 73.3 (0.4) | 74.5 (0.6) | 85.8 (0.6) | 82.9 (0.7) |
| BlueBERT  (W + BC/ P:  BaseVocab) | | 82.9 (0.1) | 84.8 (0.5) | 90.3 (2.0) | 86.2 (0.4) | 93.3 (0.3) | 78.3 (0.4) | 80.7 (0.6) | 73.5 (0.5) | 73.9 (0.8) | **86.3** (0.7) | 82.1 (0.8) |
| BlueBERT  (W + BC/ P/ M:  BaseVocab) | | 81.6 (0.5) | 84.6 (0.8) | 82.0 (5.1) | 84.7 (0.3) | 92.3 (0.1) | **79.9** (0.4) | 78.8 (0.8) | 68.6 (0.5) | **75.8** (0.3) | 85.0 (0.4) | **83.9** (0.8) |
| ouBioBERT  (prop fP + oP:  AmpVocab) | |  |  |  |  |  |  |  |  |  |  |  |
| *SimPT* | *AmpV* |  |  |  |  |  |  |  |  |  |  |  |
| ✓ | ✓ | **83.9** (0.2) | 84.5 (0.5) | 93.1 (0.5) | 87.3 (0.3) | 93.9 (0.1) | 79.8 (0.3) | 80.7 (0.7) | **75.5** (0.3) | 74.7 (0.5) | 86.2 (0.6) | 83.2 (0.4) |
| ✓ |  | 83.9 (0.3) | 85.0 (0.2) | **93.3** (1.4) | **87.4** (0.2) | 93.9 (0.4) | 79.4 (0.4) | **81.3** (0.9) | 74.8 (0.3) | 74.6 (0.5) | 85.4 (0.8) | 83.6 (0.4) |
|  |  | 83.6 (0.1) | **85.0** (0.3) | 92.6 (0.6) | 87.1 (0.3) | **94.1** (0.3) | 78.9 (0.6) | 81.1 (0.7) | 74.1 (0.3) | 74.1 (0.6) | 85.9 (0.4) | 82.7 (0.5) |

**Notes: The numbers are mean (standard deviation) on five different random seeds. The best scores are in bold, and the second best are underlined. SimPT: simultaneous pre-training; AmpV: Amplified vocabulary.**
